# Supplementary material for: Tissue Distribution of ACE2 Protein in Syrian Golden Hamster (Mesocricetus auratus) and Its Possible Implications in SARS-CoV-2 Related Studies
Source: PubMed Central journal article supplement (PMC7869018; doi:10.3389/fphar.2020.579330), 2021-01-14

**Supplementary figure 1:** Immunofluorescence images of hamster tissues stained with antibodies with or without preadsorption.

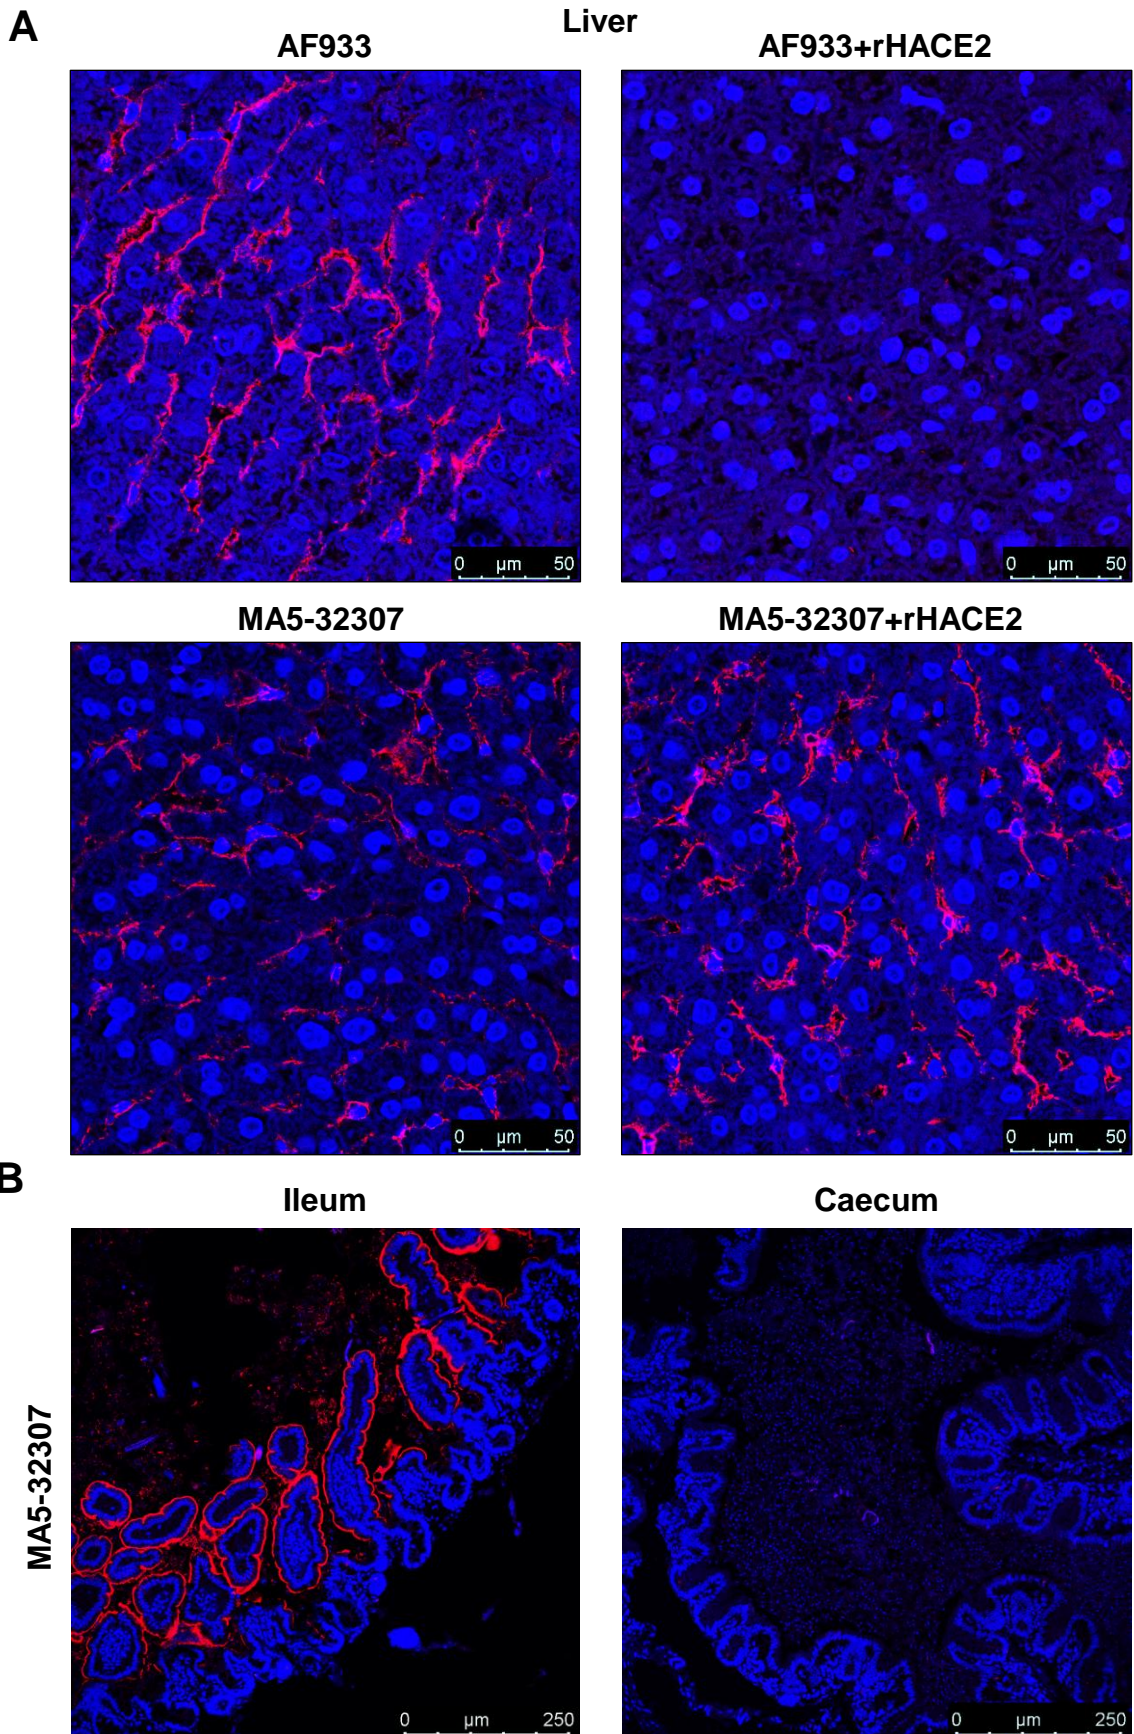

Supplement: datasheet1.pdf [file datasheet1.pdf]
